PS Form 3526

Statement of Ownership, Management, and Circulation  
(All Periodicals Publications Except Requester Publications)

|                                                                                                                                                                                                                                                                                                                                                                                                                                                                                                                                                                         |                                                              |                                           |                                                             |
|-------------------------------------------------------------------------------------------------------------------------------------------------------------------------------------------------------------------------------------------------------------------------------------------------------------------------------------------------------------------------------------------------------------------------------------------------------------------------------------------------------------------------------------------------------------------------|--------------------------------------------------------------|-------------------------------------------|-------------------------------------------------------------|
| 1. Publication Title<br>AMERICAN PSYCHIATRIC ASSOCIATION/<br>PSYCHIATRIC SERVICES                                                                                                                                                                                                                                                                                                                                                                                                                                                                                       | 2. Publication Number<br>251290                              | ISSN<br>10752730                          | 3. Filing Date<br>09/18/2018                                |
| 4. Issue Frequency<br>MONTHLY                                                                                                                                                                                                                                                                                                                                                                                                                                                                                                                                           | 5. Number of Issues Published Annually<br>12                 | 6. Annual Subscription Price<br>\$ 162.00 |                                                             |
| 7. Complete Mailing Address of Known Office of Publication<br>1000 WILSON BLVD STE 1825<br>ARLINGTON, ARLINGTON, VA 22209-3924                                                                                                                                                                                                                                                                                                                                                                                                                                          |                                                              |                                           | Contact Person<br>BRIAN COLE<br>Telephone<br>(202) 459-9750 |
| 8. Complete Mailing Address of Headquarters or General Business Office of Publisher<br>800 Maine Avenue, S.W., Suite 900<br>Washington, DC 20024-2812                                                                                                                                                                                                                                                                                                                                                                                                                   |                                                              |                                           |                                                             |
| 9. Full Names and Complete Mailing Addresses of Publisher, Editor, and Managing Editor                                                                                                                                                                                                                                                                                                                                                                                                                                                                                  |                                                              |                                           |                                                             |
| Publisher (Name and complete mailing address)<br>John McCullie<br>800 Maine Avenue, S.W., Suite 900<br>Washington, DC 20024-2812                                                                                                                                                                                                                                                                                                                                                                                                                                        |                                                              |                                           |                                                             |
| Editor (Name and complete mailing address)<br>Lisa B. Dixon, M.D., M.P.H.<br>800 Maine Avenue, S.W., Suite 900<br>Washington, DC 20024-2812                                                                                                                                                                                                                                                                                                                                                                                                                             |                                                              |                                           |                                                             |
| Managing Editor (Name and complete mailing address)<br>Demarrie S. Jackson<br>800 Maine Avenue, S.W., Suite 900<br>Washington, DC 20024-2812                                                                                                                                                                                                                                                                                                                                                                                                                            |                                                              |                                           |                                                             |
| 10. Owner (Do not leave blank. If the publication is owned by a corporation, give the name and address of the corporation immediately followed by the names and addresses of all stockholders owning or holding 1 percent or more of the total amount of stock. If not owned by a corporation, give names and addresses of the individual owners. If owned by a partnership or other unincorporated firm, give its name and address as well as those of each individual owner. If the publication is published by a nonprofit organization, give its name and address.) |                                                              |                                           |                                                             |
| Full Name                                                                                                                                                                                                                                                                                                                                                                                                                                                                                                                                                               | Complete Mailing Address                                     |                                           |                                                             |
| American Psychiatric Assoc.                                                                                                                                                                                                                                                                                                                                                                                                                                                                                                                                             | 800 Maine Avenue, S.W., Suite 900, Washington, DC 20024-2812 |                                           |                                                             |
| 11. Known Bondholders, Mortgagees, and Other Security Holders Owning or Holding 1 Percent or More of Total Amount of Bonds, Mortgages, or Other Securities. If none, check box <input checked="" type="checkbox"/> None                                                                                                                                                                                                                                                                                                                                                 |                                                              |                                           |                                                             |
| Full Name                                                                                                                                                                                                                                                                                                                                                                                                                                                                                                                                                               | Complete Mailing Address                                     |                                           |                                                             |

PS Form 3526, September 2007 (Page 1)

PRIVACY NOTICE: See our privacy policy on www.usps.com

|                                                                                                                                                                    |                                                          |                                                             |
|--------------------------------------------------------------------------------------------------------------------------------------------------------------------|----------------------------------------------------------|-------------------------------------------------------------|
| 13. Publication Title<br>AMERICAN PSYCHIATRIC ASSOCIATION/PSYCHIATRIC SERVICES                                                                                     | 14. Issue Date for Circulation Data Below<br>09/01/2018  |                                                             |
| 15. Extend and Nature of Circulation                                                                                                                               | Average No. Copies Each Issue During Preceding 12 Months | No. Copies of Single Issue Published Nearest to Filing Date |
| a. Total Numbers of Copies (Net press run)                                                                                                                         | 621                                                      | 524                                                         |
| (1) Mailed Outside County Paid Subscriptions Stated on PS Form 3541 (include paid distribution above nominal rate, advertiser's proof copies, and exchange copies) | 246                                                      | 234                                                         |
| b. Paid Circulation (By Mail and Outside the Mail)                                                                                                                 |                                                          |                                                             |
| (2) Mailed In-County Paid Subscriptions Stated on PS Form 3541 (include paid distribution above nominal rate, advertiser's proof copies, and exchange copies)      | 0                                                        | 0                                                           |
| (3) Paid Distribution Outside the Mails Including Sales Through Dealers and Carriers, Street Vendors, Counter Sales, and Other Paid Distribution Outside USPS      | 54                                                       | 51                                                          |
| (4) Paid Distribution by Other Classes of Mail Through the USPS (e.g. First-Class Mail)                                                                            | 0                                                        | 0                                                           |
| c. Total Paid Distribution (Sum of 15b (1), (2), (3), (4))                                                                                                         | 300                                                      | 285                                                         |
| d. Free or Nominal Rate Distribution (By Mail and Outside the Mail)                                                                                                |                                                          |                                                             |
| (1) Free or Nominal Rate Outside County Copies included on PS Form 3541                                                                                            | 95                                                       | 91                                                          |
| (2) Free or Nominal Rate In-County Copies included on PS Form 3541                                                                                                 | 0                                                        | 0                                                           |
| (3) Free or Nominal Rate Copies Mailed at Other Classes Through the USPS (e.g. First-Class Mail)                                                                   | 0                                                        | 0                                                           |
| (4) Free or Nominal Rate Distribution Outside the Mail (Carriers or other means)                                                                                   | 77                                                       | 77                                                          |
| e. Total Free or Nominal Rate Distribution (Sum of 15d (1), (2), (3), (4))                                                                                         | 172                                                      | 168                                                         |
| f. Total Distribution (Sum of 15c and 15e)                                                                                                                         | 472                                                      | 453                                                         |
| g. Copies not Distributed                                                                                                                                          | 0                                                        | 0                                                           |
| h. Total (Sum of 15f and 15g)                                                                                                                                      | 472                                                      | 453                                                         |
| i. Percent Paid ((15c / 15f) times 100)                                                                                                                            | 63.56 %                                                  | 62.91 %                                                     |
| 16. If total circulation includes electronic copies, report that circulation on lines below.                                                                       |                                                          |                                                             |
| a. Paid Electronic Copies                                                                                                                                          | 0                                                        | 0                                                           |
| b. Total Paid Print Copies (Line 15c) + Paid Electronic Copies                                                                                                     | 0                                                        | 0                                                           |
| c. Total Print Distribution (Line 15f) + Paid Electronic Copies                                                                                                    | 0                                                        | 0                                                           |
| d. Percent Paid (Both Print and Electronic Copies)                                                                                                                 | 0.00 %                                                   | 0.00 %                                                      |
| <input type="checkbox"/> I certify that 50% of all my distributed copies (Electronic and Print) are paid above a nominal price.                                    |                                                          |                                                             |

17. Publication of Statement of Ownership  
 If the publication is a general publication, publication of this statement is required. Will be printed in the 11/01/2018 issue of this publication.  Publication not required.

|                                                                          |                            |                        |
|--------------------------------------------------------------------------|----------------------------|------------------------|
| 18. Signature and Title of Editor, Publisher, Business Manager, or Owner | Title                      | Date                   |
| Brian Cole                                                               | Publishing Systems Manager | 09/18/2018 11:44:26 AM |

I certify that all information furnished on this form is true and complete. I understand that anyone who furnishes false or misleading information on this form or who omits material or information requested on the form may be subject to criminal sanctions (including fines and imprisonment) and/or civil sanctions (including civil penalties).

PS Form 3526, September 2007 (Page 2)

PRIVACY NOTICE: See our privacy policy on www.usps.com

# Student Mental Health

A Guide for Psychiatrists,  
Psychologists, and Leaders  
Serving in Higher Education

Edited by Laura Weiss Roberts, M.D., M.A.

## Student Mental Health

is both down-to-earth and aspirational, providing evidence and best practices to ensure greater mental health on campus, while stimulating conversation about how to ensure and optimize the value of higher education through thoughtful, sophisticated approaches to student mental health.

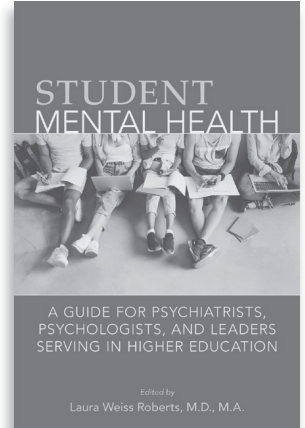

The chapter authors address life transitions and the university student experience, as well as the challenges of caring for university students with mental health issues.

The book has positive strategies, including ways to foster mental health for distinct university student populations.

2018 • 530 pages • ISBN 978-1-61537-114-3 • Paperback • \$62.00 • Item #37114

2018 • 530 pages • ISBN 978-1-61537-194-5 • eBook • \$49.95 • Item #37194

AMERICAN  
PSYCHIATRIC  
ASSOCIATION  
PUBLISHING

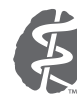

www.appi.org  
Toll Free: 1-800-368-5777  
Email: appi@psych.org

20% Discount • American Psychiatric Association Members  
25% Discount • APA Resident-Fellow Members

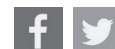

AH1846

## The Art and Science of Brief Psychotherapies *A Practitioner's Guide, Third Edition*

Edited by Mantosh J. Dewan, M.D.,  
Brett N. Steenbarger, Ph.D., and Roger P. Greenberg, Ph.D.

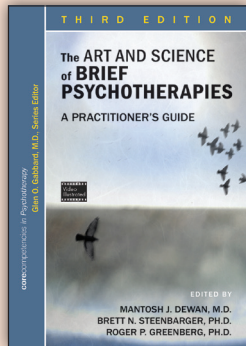

Each chapter is thoroughly updated, and new chapters cover such topics as dialectical behavior therapy, multicultural practice, and mentalizing, as well as fresh approaches to intervention, such as telepsychiatry and Internet-based interventions.

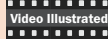

2018 • 397 pages • ISBN 978-1-61537-079-5 • Paperback • \$87.00 • Item #37079

2018 • 397 pages • ISBN 978-1-61537-151-8 • eBook • \$70.00 • Item #37151

AMERICAN  
PSYCHIATRIC  
ASSOCIATION  
PUBLISHING

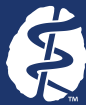

www.appi.org  
Email: appi@psych.org  
Phone: 1-800-368-5777

AH1822A

# Our Work Matters

Hope. Recovery. Wellbeing.

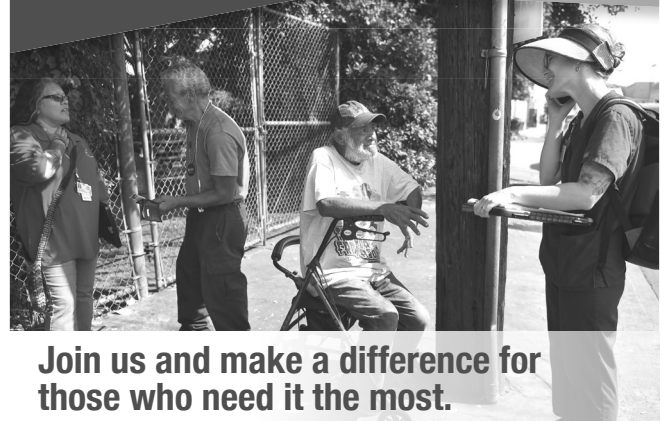

## Join us and make a difference for those who need it the most.

Los Angeles County Department of Mental Health is a nationally recognized leader providing a wide range of services to one of the largest populations in the country. We invite you to join our team as we help the most vulnerable in our community find a path to independence and personal recovery.

Starting annual salary immediately post residency completion is **\$233,784** with **potential bonuses of \$32,000 annually**. Student loan repayment and recruitment incentives available.

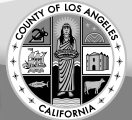

[www.psychiatristjobs.la](http://www.psychiatristjobs.la)

# APA JobCentral

## The Career Hub for Psychiatry

### Manage Your Career

- Browse hundreds of active job listings!
- Create an account to save jobs, store multiple resumes and cover letters and communicate with employers through our internal messaging system.
- Set up multiple job alerts specifying your skills, interests and location to receive e-mails when employers post jobs that match your criteria.

### Recruit for Open Positions

- Post your job in front of thousands of highly qualified psychiatrists.
- Cross promote your job listing in *Psychiatric News*.
- Search the anonymous resume database to find your ideal candidate.

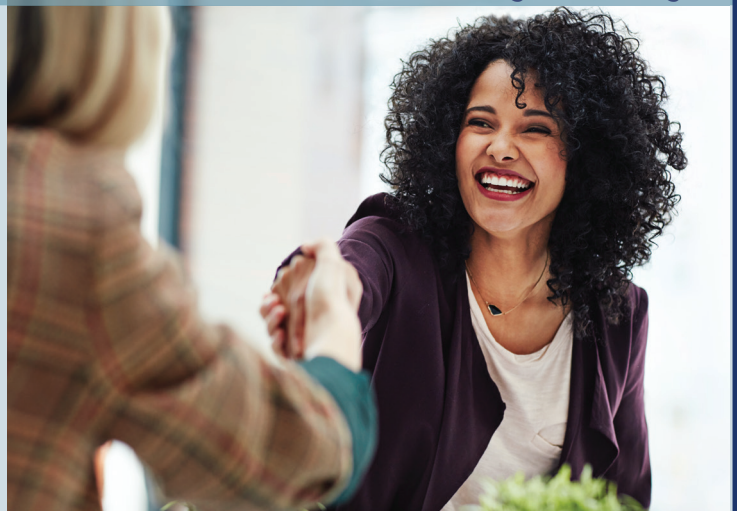

[jobs.psychiatry.org](http://jobs.psychiatry.org)

AMERICAN  
PSYCHIATRIC  
ASSOCIATION

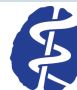

**JOBCENTRAL**  
The Career Hub for Psychiatry

AH1803A

# APA Publishing Journals at PSYCHIATRYonline

The one-stop resource for information on diagnosis, treatment, guidelines, the latest research, and breaking news from the field.

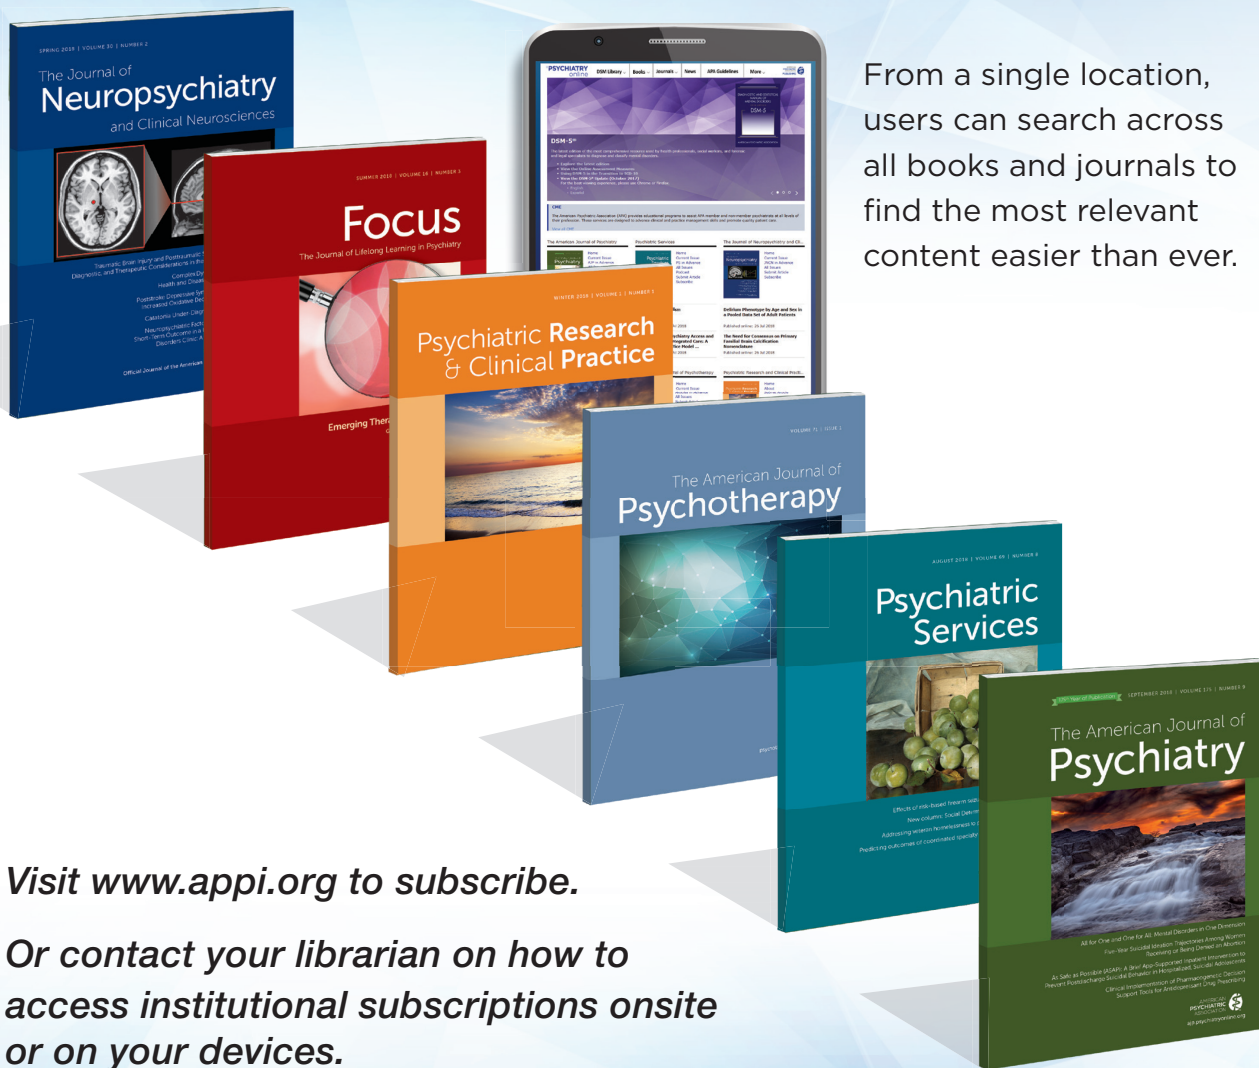

From a single location, users can search across all books and journals to find the most relevant content easier than ever.

*Visit [www.appi.org](http://www.appi.org) to subscribe.*

*Or contact your librarian on how to access institutional subscriptions onsite or on your devices.*

*Institutional subscription options are available. For more information contact: [institutions@psych.org](mailto:institutions@psych.org); 800-368-5777 ext. 3720*

AMERICAN  
PSYCHIATRIC  
ASSOCIATION  
PUBLISHING

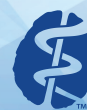

[appi.org](http://appi.org)  
1-800-368-5777  
[appi@psych.org](mailto:appi@psych.org)
