# Psychiatric Services

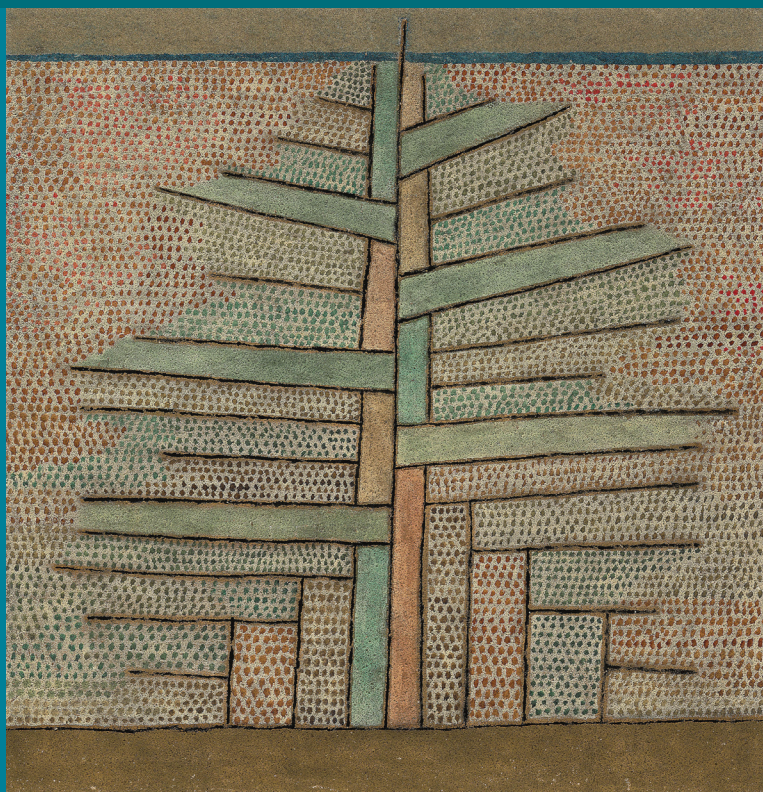

Viewpoint: Two views on gun violence and suicide prevention  
Improving treatment engagement with a shared decision-making app  
Internet-based outreach for persons with first-episode psychosis  
Recovery colleges and what makes them work
